# Supplementary material for: Taxonomical and functional changes in COVID‐19 faecal microbiome could be related to SARS‐CoV‐2 faecal load
Source: PubMed Central journal article supplement — Environ Microbiol. 2022 May 9;24(9):4299–316. doi: 10.1111/1462-2920.16028 (PMC9347659; doi:10.1111/1462-2920.16028), 2022-05-09

S 1

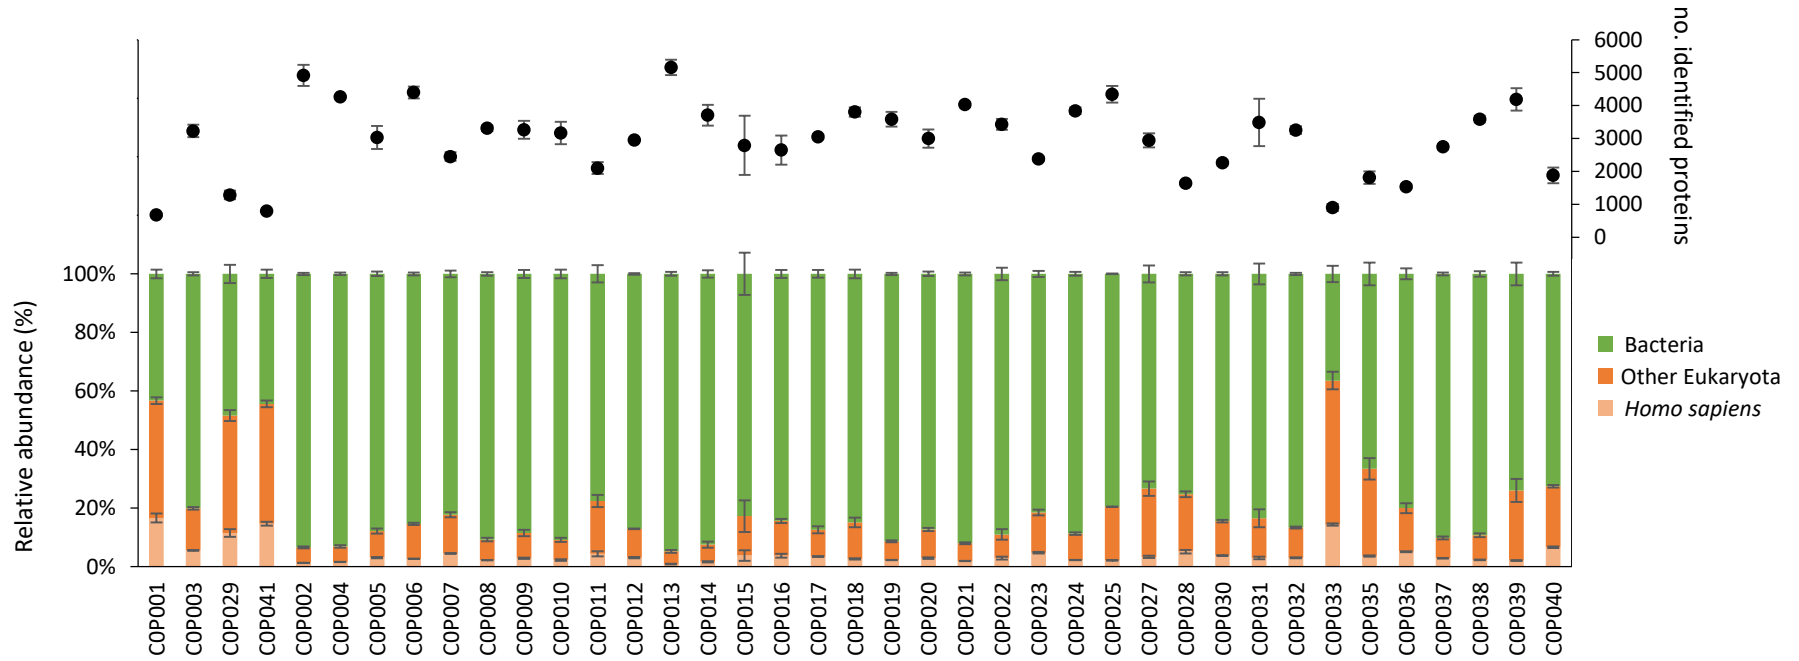

Number of proteins identified per sample and relative abundance of broad taxonomic categories



## S 2C

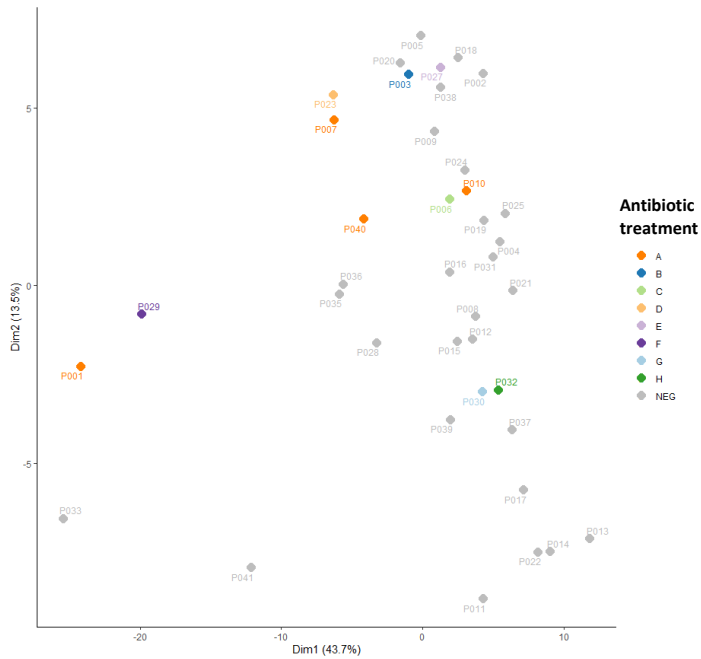

(A) Amoxicillin/clavulanate, (B) 3rd gen cephalosporin plus metronidazole, (C) Vancomycin plus Cephazolin followed by Linezolid, (D) Ceftriaxone, (E) Trimethoprim/Sulfamethoxazole, (F) Amikin plus Imipenem/ Cilastatin, (G) Cefotaxime plus Spiramycin, (H) Cefotaxime plus Daptomycin

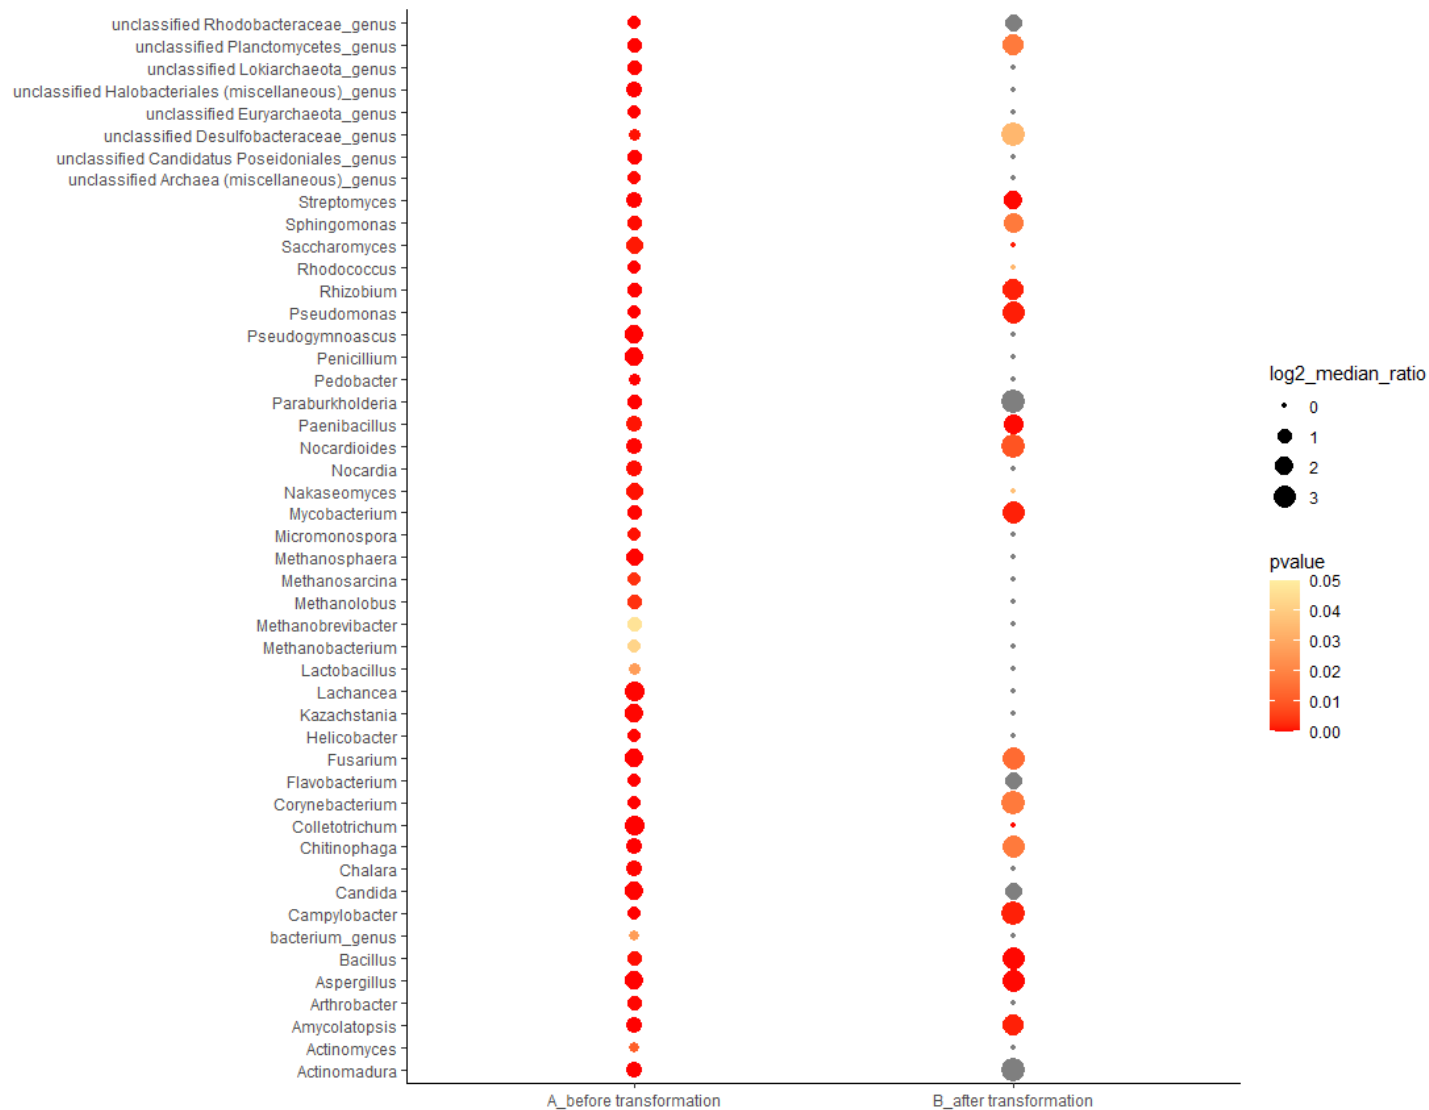

Supplement: EMI-24-4299-s001.pdf [file EMI-24-4299-s001.pdf]
